# Supplementary material
Source: PubMed Central journal article supplement (PMC3880800)
Supplement: NIHMS532535-supplement-1.pdf [file NIHMS532535-supplement-1.pdf]

## Annexe 1. Abbreviations/glossary of terms

|                                                |                                                                                                                                                                           |
|------------------------------------------------|---------------------------------------------------------------------------------------------------------------------------------------------------------------------------|
| <b>Aβ</b>                                      | Amyloid beta peptide                                                                                                                                                      |
| <b>Aβ<sub>40</sub></b>                         | Amyloid beta peptide fragment with amino acids 1-40                                                                                                                       |
| <b>Aβ<sub>42</sub></b>                         | Amyloid beta peptide fragment with amino acids 1-42                                                                                                                       |
| <b>AD</b>                                      | Alzheimer's disease                                                                                                                                                       |
| <b>ADAD</b>                                    | Autosomal dominant Alzheimer's disease                                                                                                                                    |
| <b>ADCS</b>                                    | Alzheimer's Disease Cooperative Study                                                                                                                                     |
| <b>ADNI</b>                                    | Alzheimer's Disease Neuroimaging Initiative                                                                                                                               |
| <b>AE</b>                                      | Adverse event                                                                                                                                                             |
| <b>APOE</b>                                    | Apolipoprotein E genotype, the <i>APOE ε4</i> allele is associated with increased risk of developing AD pathology                                                         |
| <b>ARIA</b>                                    | Amyloid-related imaging abnormalities (includes those that occur both after treatment and during the natural history of untreated Alzheimer's disease)                    |
| <b>ARIA-E</b>                                  | Amyloid-related imaging abnormality characterized by vasogenic edema, including both parenchymal and in leptomeningeal spaces                                             |
| <b>ARIA-H</b>                                  | Amyloid-related imaging abnormality characterized by hemorrhage, including microhemorrhage, macrohemorrhage (e.g., lobar hemorrhage) and superficial hemosiderin deposits |
| <b>CDR-SB</b>                                  | Clinical Dementia Rating Sum of Boxes                                                                                                                                     |
| <b>CNS</b>                                     | Central nervous system                                                                                                                                                    |
| <b>CSF</b>                                     | Cerebrospinal fluid                                                                                                                                                       |
| <b>C-SSRS</b>                                  | Columbia suicide severity rating scale                                                                                                                                    |
| <b>DIAN</b>                                    | Dominantly Inherited Alzheimer Network, a multicenter international observational study supported by the National Institutes of Health                                    |
| <b>DIAN-TU</b>                                 | Dominantly Inherited Alzheimer Network Trials Unit                                                                                                                        |
| <b>ECG</b>                                     | Electrocardiogram                                                                                                                                                         |
| <b>EDC</b>                                     | Electronic data capture                                                                                                                                                   |
| <b>FDA</b>                                     | Food and Drug Administration                                                                                                                                              |
| <b>FDG-PET</b>                                 | PET imaging with 2-[ <sup>18</sup> F] fluoro-2-deoxy-D-glucose                                                                                                            |
| <b>Florbetapir F 18</b>                        | AV-45, an FDA-approved [ <sup>18</sup> F] PET amyloid imaging agent                                                                                                       |
| <b>GCP</b>                                     | Good clinical practice                                                                                                                                                    |
| <b>ICF</b>                                     | Informed Consent Form                                                                                                                                                     |
| <b>ICH</b>                                     | International Conference on Harmonisation                                                                                                                                 |
| <b>IRB</b>                                     | Institutional review board                                                                                                                                                |
| <b>IVRS</b>                                    | Interactive voice response system (used only if technological constraints preclude use of interactive web response system)                                                |
| <b>LFT</b>                                     | Liver function test                                                                                                                                                       |
| <b>LOCF</b>                                    | Last observation carried forward                                                                                                                                          |
| <b>LP</b>                                      | Lumbar puncture                                                                                                                                                           |
| <b>MMSE</b>                                    | Mini-Mental State Exam                                                                                                                                                    |
| <b><i>MR Technical Manual</i></b>              | Manual providing specific information on procedures for MRI                                                                                                               |
| <b>MRI</b>                                     | Magnetic resonance imaging                                                                                                                                                |
| <b>NONMEM</b>                                  | A non-linear mixed effects modeling software tool used in population pharmacokinetic-pharmacodynamic analysis                                                             |
| <b>NPI-Q</b>                                   | Neuropsychiatric Inventory Questionnaire                                                                                                                                  |
| <b>PET</b>                                     | Positron emission tomography                                                                                                                                              |
| <b><i>PET Technical Procedures Manual.</i></b> | Manual providing specific guidance on procedures for PET imaging                                                                                                          |
| <b>[<sup>11</sup>C]PiB-PET</b>                 | Positron emission tomography with [ <sup>11</sup> C]-Pittsburgh Compound B                                                                                                |

|               |                                            |
|---------------|--------------------------------------------|
| <b>PSEN1</b>  | (PiB)<br>Presenilin 1                      |
| <b>PSEN2</b>  | Presenilin 2                               |
| <b>QC</b>     | Quality control                            |
| <b>SAE</b>    | Serious adverse event                      |
| <b>Tau</b>    | Tau protein                                |
| <b>UA</b>     | Urinalysis                                 |
| <b>vMRI</b>   | Volumetric magnetic resonance imaging      |
| <b>WAIS-R</b> | Wechsler Adult Intelligence Scale- Revised |
| <b>WMS-R</b>  | Wechsler Memory Scale-Revised              |
